# Supplementary material for: Lanthanide complexes with a new luminescent iminophosphonamide ligand bearing phenylbenzothiazole substituents
Source: Royal Society of Chemistry journal article supplement (doi:10.1039/d3dt03511e), 2023-12-20
Supplement: d3dt03511e1.pdf [file d3dt03511e1.pdf]

## Supplementary information

Received 21th October 2023,  
Accepted 19th December 2023  
DOI: 10.1039/d3dt03511e

### Lanthanide complexes with a new luminescent iminophosphonamide ligand bearing phenylbenzothiazole substituents

Dmitry K. Sinitisa,<sup>a</sup> Ekaterina K. Pylova,<sup>a,b,c</sup> Olga A. Mironova,<sup>a,\*</sup> Denis A. Bashirov,<sup>a</sup>  
Alexey A. Ryadun,<sup>a</sup> Taisiya S. Sukhikh,<sup>a</sup> and Sergey N. Konchenko<sup>a,\*\*</sup>

<sup>a</sup>Nikolaev Institute of Inorganic Chemistry SB RAS, Akademika Lavrentieva Ave. 3, 630090 Novosibirsk, Russia.

E-mail: \*[mironovaoa.nsk@gmail.com](mailto:mironovaoa.nsk@gmail.com) \*\*[konch@niic.nsc.ru](mailto:konch@niic.nsc.ru)

<sup>b</sup>Department of Natural Sciences, National Research University—Novosibirsk State University, 630090 Novosibirsk, Russia

<sup>c</sup>Institute Charles Gerhardt Montpellier, National School of Chemistry Montpellier, University of Montpellier, CNRS, ENSCM, 34000 Montpellier, France

#### Table of contents:

- Crystallographic data
- Spectroscopy & PXRD data
- Photophysical measurements
- Additional information

---

Nikolaev Institute of Inorganic Chemistry SB RAS, Akademika Lavrentieva Ave. 3, 630090 Novosibirsk, Russia.

E-mail: \*[mironovaoa.nsk@gmail.com](mailto:mironovaoa.nsk@gmail.com) \*\*[konch@niic.nsc.ru](mailto:konch@niic.nsc.ru)

† Electronic supplementary information (ESI) available: crystallographic data, NMR spectra, PXRD data for 1, electronic absorption and luminescence spectra of the compounds, scheme of the extraction apparatus, and additional figures of structures. CCDC 2292469-2292473, 2293519 and 2312448. For ESI and crystallographic data in CIF or another electronic format see DOI: See DOI: 10.1039/d3dt03511e

## Crystallographic data

Table S1. Crystal data and structure refinement for the compounds

| Identification code                                  | 1                                                              | 1·CH <sub>3</sub> CN                                           | 3·0.5thf·1.5tol                                                                                     | 3*·0.4hexane·1.2tol                                                                  | 4·0.5thf·2tol                                                                                      | 5·3thf·3tol                                                                                      | 6·4thf·2tol                                                                                      |
|------------------------------------------------------|----------------------------------------------------------------|----------------------------------------------------------------|-----------------------------------------------------------------------------------------------------|--------------------------------------------------------------------------------------|----------------------------------------------------------------------------------------------------|--------------------------------------------------------------------------------------------------|--------------------------------------------------------------------------------------------------|
| CCDC Number                                          | 2292469                                                        | 2293519                                                        | 2292470                                                                                             | 2312448                                                                              | 2292473                                                                                            | 2292471                                                                                          | 2292472                                                                                          |
| Empirical formula                                    | C <sub>38</sub> H <sub>27</sub> N <sub>4</sub> PS <sub>2</sub> | C <sub>40</sub> H <sub>30</sub> N <sub>5</sub> PS <sub>2</sub> | C <sub>126.5</sub> H <sub>94</sub> N <sub>12</sub> O <sub>0.5</sub> P <sub>3</sub> S <sub>6</sub> Y | C <sub>124.8</sub> H <sub>93.0</sub> N <sub>12</sub> P <sub>3</sub> S <sub>6</sub> Y | C <sub>130</sub> H <sub>98</sub> N <sub>12</sub> O <sub>0.5</sub> P <sub>3</sub> S <sub>6</sub> Sm | C <sub>147</sub> H <sub>126</sub> GdN <sub>12</sub> O <sub>3</sub> P <sub>3</sub> S <sub>6</sub> | C <sub>144</sub> H <sub>126</sub> DyN <sub>12</sub> O <sub>4</sub> P <sub>3</sub> S <sub>6</sub> |
| Formula weight                                       | 634.72                                                         | 675.78                                                         | 2164.31                                                                                             | 2134.96                                                                              | 2271.82                                                                                            | 2551.11                                                                                          | 2536.33                                                                                          |
| Temperature/K                                        | 150(2)                                                         | 150(2)                                                         | 150(2)                                                                                              | 150(2)                                                                               | 150(2)                                                                                             | 150(2)                                                                                           | 150(2)                                                                                           |
| Space group                                          | <i>P</i> 2 <sub>1</sub> / <i>n</i>                             | <i>P</i> 2 <sub>1</sub> / <i>n</i>                             | <i>P</i> 2 <sub>1</sub> / <i>c</i>                                                                  | <i>P</i> 2 <sub>1</sub> / <i>c</i>                                                   | <i>P</i> 2 <sub>1</sub> / <i>c</i>                                                                 | <i>P</i> 2 <sub>1</sub> / <i>c</i>                                                               | <i>P</i> 2 <sub>1</sub> / <i>c</i>                                                               |
| <i>a</i> /Å                                          | 9.1902(15)                                                     | 9.8197(15)                                                     | 19.092(2)                                                                                           | 19.093(2)                                                                            | 19.211(2)                                                                                          | 22.7279(6)                                                                                       | 22.7471(15)                                                                                      |
| <i>b</i> /Å                                          | 28.224(5)                                                      | 14.331(2)                                                      | 14.6554(16)                                                                                         | 14.6218(18)                                                                          | 14.6820(14)                                                                                        | 14.4740(5)                                                                                       | 14.4532(10)                                                                                      |
| <i>c</i> /Å                                          | 11.9753(19)                                                    | 23.996(3)                                                      | 38.107(4)                                                                                           | 38.215(5)                                                                            | 38.175(4)                                                                                          | 38.0128(12)                                                                                      | 37.979(3)                                                                                        |
| β/°                                                  | 90.930(5)                                                      | 90.960(5)                                                      | 94.156(3)                                                                                           | 94.667(3)                                                                            | 94.110(3)                                                                                          | 93.4490(10)                                                                                      | 93.482(3)                                                                                        |
| Volume/Å <sup>3</sup>                                | 3105.8(9)                                                      | 3376.4(8)                                                      | 10634(2)                                                                                            | 10633(2)                                                                             | 10739.5(18)                                                                                        | 12482.2(7)                                                                                       | 12463.2(15)                                                                                      |
| <i>Z</i>                                             | 4                                                              | 4                                                              | 4                                                                                                   | 4                                                                                    | 4                                                                                                  | 4                                                                                                | 4                                                                                                |
| ρ <sub>calc</sub> /cm <sup>3</sup>                   | 1.357                                                          | 1.329                                                          | 1.352                                                                                               | 1.334                                                                                | 1.405                                                                                              | 1.358                                                                                            | 1.352                                                                                            |
| μ/mm <sup>-1</sup>                                   | 0.258                                                          | 0.243                                                          | 0.771                                                                                               | 0.769                                                                                | 0.768                                                                                              | 0.731                                                                                            | 0.800                                                                                            |
| <i>F</i> (000)                                       | 1320.0                                                         | 1408.0                                                         | 4484.0                                                                                              | 4423.0                                                                               | 4676.0                                                                                             | 5284.0                                                                                           | 5252.0                                                                                           |
| Radiation                                            | MoKα (λ = 0.71073)                                             | MoKα (λ = 0.71073)                                             | MoKα (λ = 0.71073)                                                                                  | MoKα (λ = 0.71073)                                                                   | MoKα (λ = 0.71073)                                                                                 | MoKα (λ = 0.71073)                                                                               | MoKα (λ = 0.71073)                                                                               |
| 2θ range for data collection/°                       | 4.462 to 50.048                                                | 3.31 to 50.086                                                 | 3.622 to 49.604                                                                                     | 3.622 to 41.63                                                                       | 3.7 to 48.908                                                                                      | 3.91 to 54.248                                                                                   | 2.882 to 55.848                                                                                  |
| Index ranges                                         | -10 ≤ <i>h</i> ≤ 10, -33 ≤ <i>k</i> ≤ 33, 0 ≤ <i>l</i> ≤ 14    | -11 ≤ <i>h</i> ≤ 11, -16 ≤ <i>k</i> ≤ 17, -28 ≤ <i>l</i> ≤ 28  | -22 ≤ <i>h</i> ≤ 21, -17 ≤ <i>k</i> ≤ 17, -39 ≤ <i>l</i> ≤ 44                                       | -18 ≤ <i>h</i> ≤ 19, -14 ≤ <i>k</i> ≤ 14, -38 ≤ <i>l</i> ≤ 38                        | -22 ≤ <i>h</i> ≤ 22, -17 ≤ <i>k</i> ≤ 17, -44 ≤ <i>l</i> ≤ 44                                      | -29 ≤ <i>h</i> ≤ 29, -18 ≤ <i>k</i> ≤ 18, -48 ≤ <i>l</i> ≤ 48                                    | -29 ≤ <i>h</i> ≤ 29, -19 ≤ <i>k</i> ≤ 19, -42 ≤ <i>l</i> ≤ 50                                    |
| Reflections collected                                | 5436                                                           | 39932                                                          | 94414                                                                                               | 47109                                                                                | 104935                                                                                             | 223237                                                                                           | 109716                                                                                           |
| Independent reflections                              | 5436 [R <sub>int</sub> = 0.0613, R <sub>σ</sub> = 0.0570]      | 5951 [R <sub>int</sub> = 0.1156, R <sub>σ</sub> = 0.0763]      | 18182 [R <sub>int</sub> = 0.1600, R <sub>σ</sub> = 0.1473]                                          | 11109 [R <sub>int</sub> = 0.1596, R <sub>σ</sub> = 0.1325]                           | 17657 [R <sub>int</sub> = 0.1170, R <sub>σ</sub> = 0.0812]                                         | 27557 [R <sub>int</sub> = 0.0827, R <sub>σ</sub> = 0.0448]                                       | 29622 [R <sub>int</sub> = 0.0577, R <sub>σ</sub> = 0.0596]                                       |
| Restraints/parameters                                | 1/410                                                          | 1/437                                                          | 18/1280                                                                                             | 11109/195/1333                                                                       | 131/1364                                                                                           | 11/1414                                                                                          | 10/1398                                                                                          |
| Goodness-of-fit on <i>F</i> <sup>2</sup>             | 1.127                                                          | 1.044                                                          | 1.031                                                                                               | 1.017                                                                                | 1.184                                                                                              | 1.038                                                                                            | 1.019                                                                                            |
| Final <i>R</i> indexes [ <i>I</i> ≥ 2σ ( <i>I</i> )] | R <sub>1</sub> = 0.0817, wR <sub>2</sub> = 0.2339              | R <sub>1</sub> = 0.0549, wR <sub>2</sub> = 0.1289              | R <sub>1</sub> = 0.0902, wR <sub>2</sub> = 0.1956                                                   | R <sub>1</sub> = 0.0718, wR <sub>2</sub> = 0.1527                                    | R <sub>1</sub> = 0.0841, wR <sub>2</sub> = 0.1753                                                  | R <sub>1</sub> = 0.0454, wR <sub>2</sub> = 0.1080                                                | R <sub>1</sub> = 0.0517, wR <sub>2</sub> = 0.1305                                                |
| Final <i>R</i> indexes [all data]                    | R <sub>1</sub> = 0.0969, wR <sub>2</sub> = 0.2433              | R <sub>1</sub> = 0.0773, wR <sub>2</sub> = 0.1444              | R <sub>1</sub> = 0.1637, wR <sub>2</sub> = 0.2303                                                   | R <sub>1</sub> = 0.1349, wR <sub>2</sub> = 0.1838                                    | R <sub>1</sub> = 0.1113, wR <sub>2</sub> = 0.1860                                                  | R <sub>1</sub> = 0.0578, wR <sub>2</sub> = 0.1157                                                | R <sub>1</sub> = 0.0701, wR <sub>2</sub> = 0.1419                                                |
| Largest diff. peak/hole / e Å <sup>-3</sup>          | 0.37/-0.55                                                     | 0.31/-0.37                                                     | 1.33/-1.10                                                                                          | 0.74/-0.60                                                                           | 1.92/-1.36                                                                                         | 1.06/-0.93                                                                                       | 1.80/-0.92                                                                                       |

## Spectroscopy &amp; PXRD data

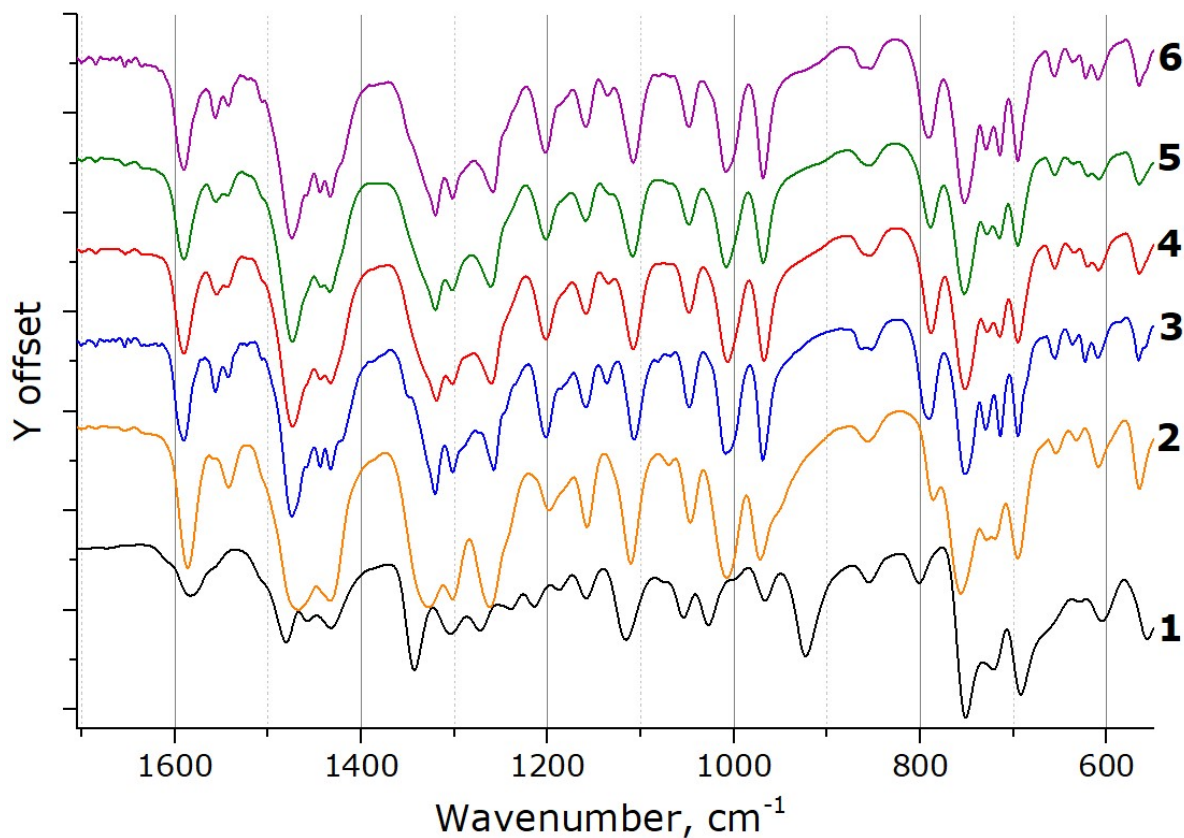

Figure S1. IR spectra of compounds 1-6.

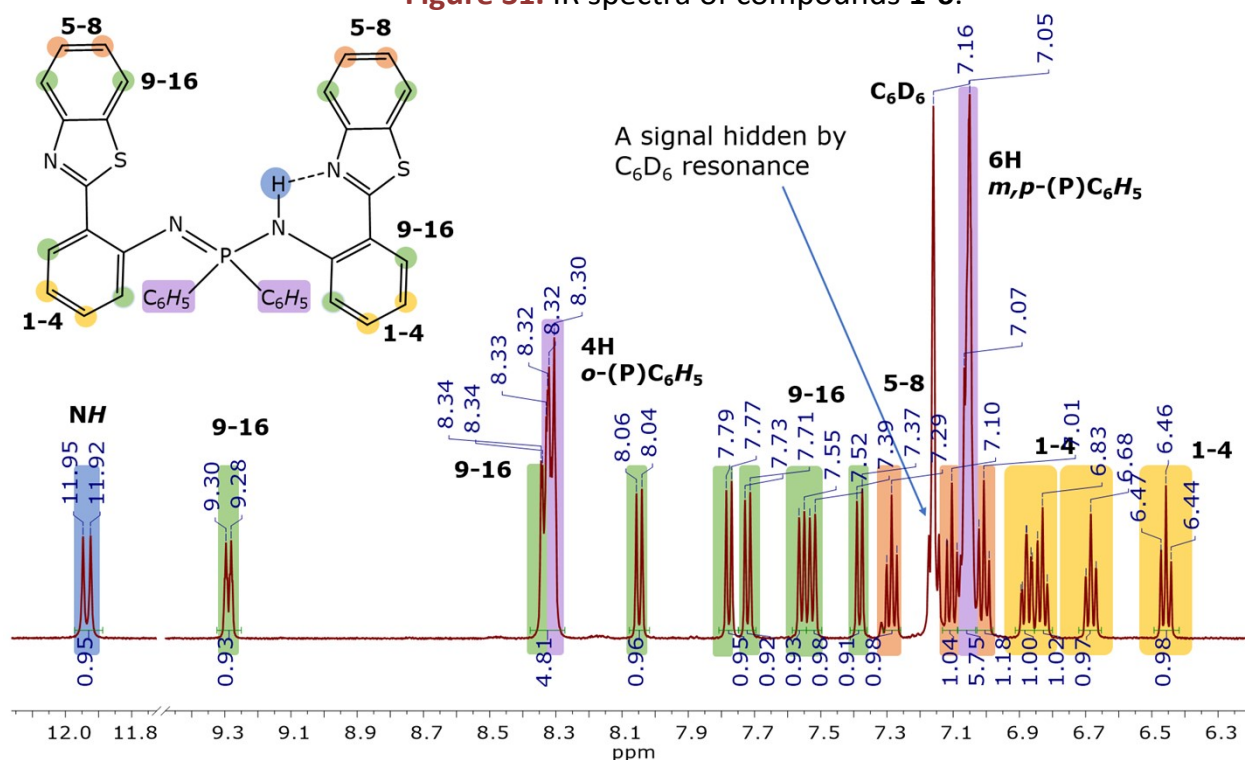Figure S2.  $^1\text{H}$  NMR spectrum of **1** in benzene- $d_6$ .

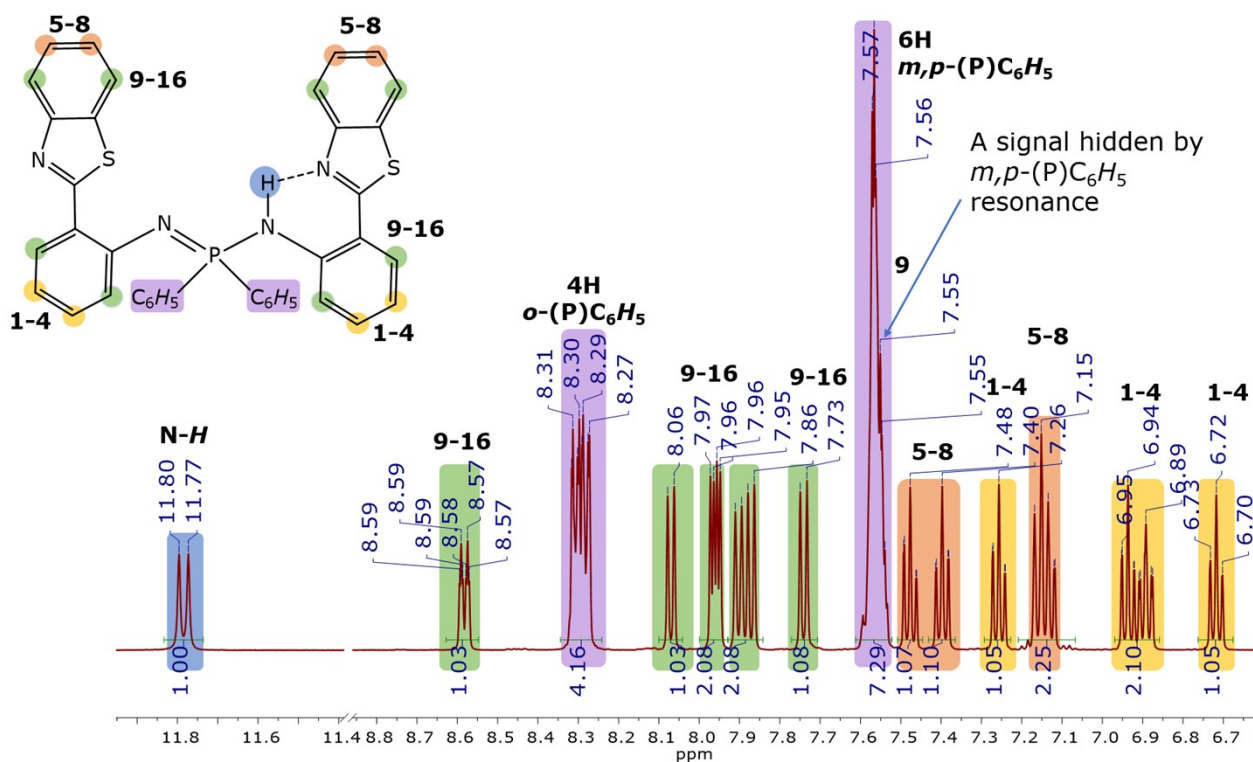

Figure S3.  $^1\text{H}$  NMR spectrum of **1** in  $\text{thf-d}_8$ .

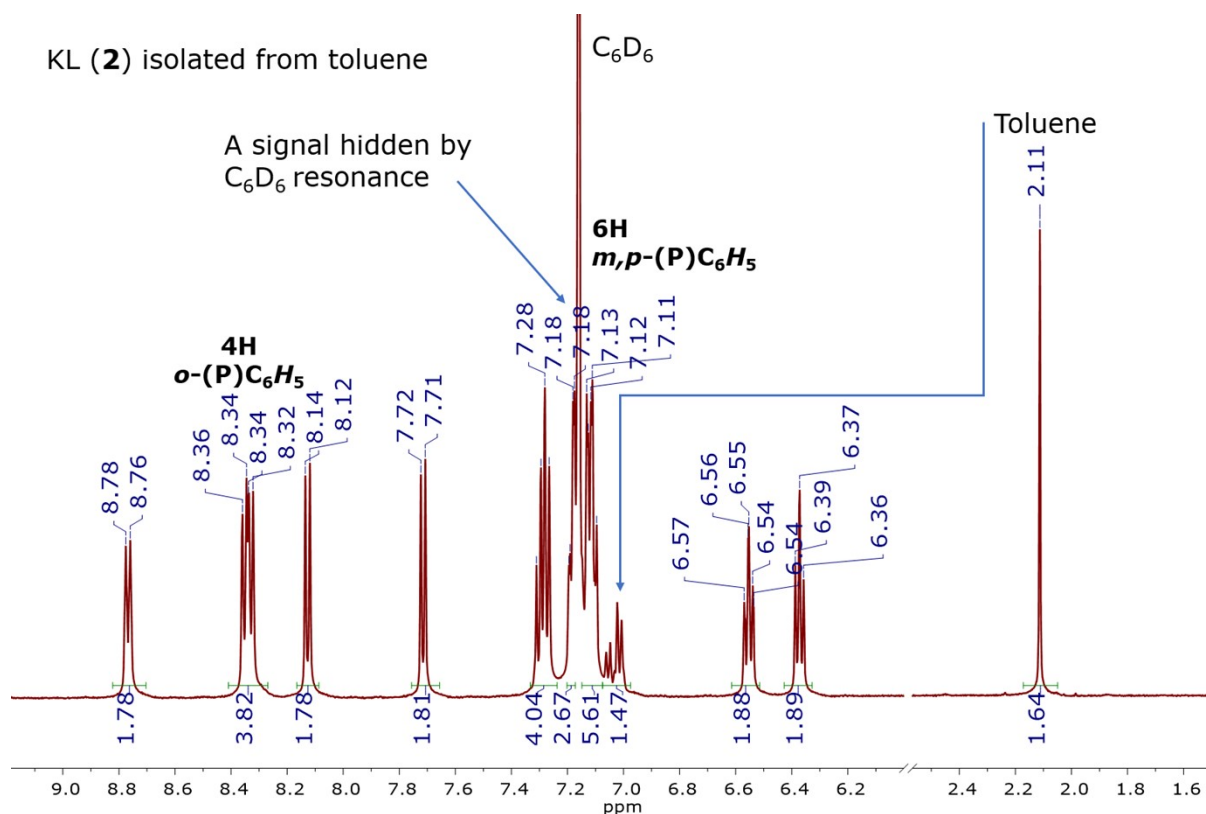

Figure S4.  $^1\text{H}$  NMR spectrum of **2** in  $\text{benzene-d}_6$ .

**[YL<sub>2</sub>]L (3)**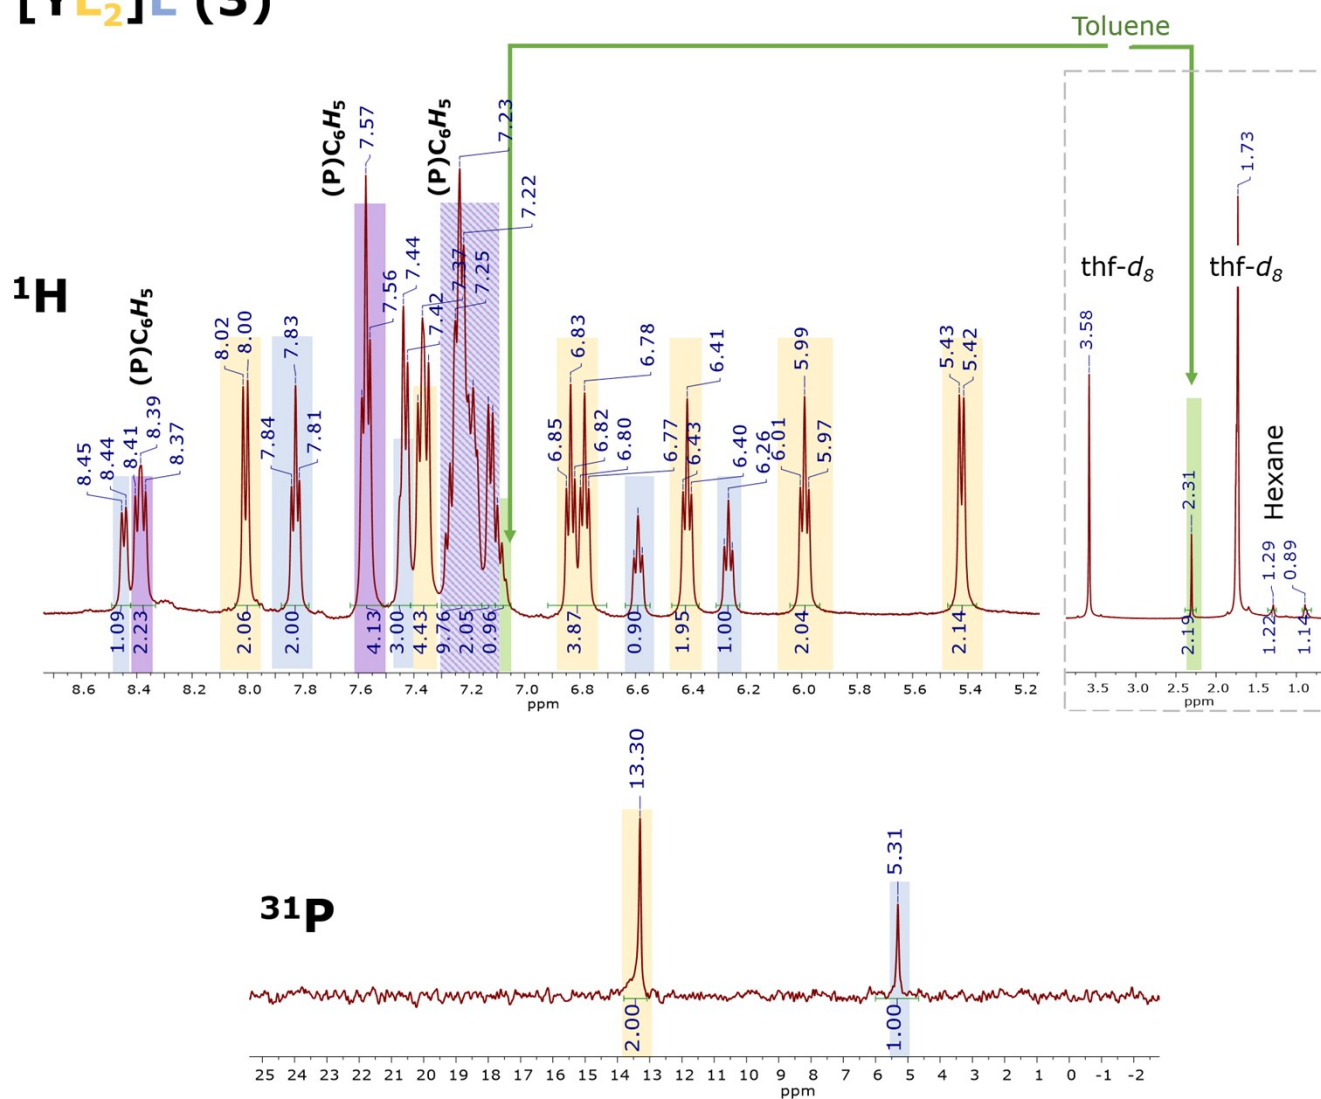

**Figure S5.** An approximate assignment of signals in the <sup>1</sup>H NMR and <sup>31</sup>P spectra of **3** in thf-d<sub>8</sub>.



**[SmL<sub>2</sub>]L (4)**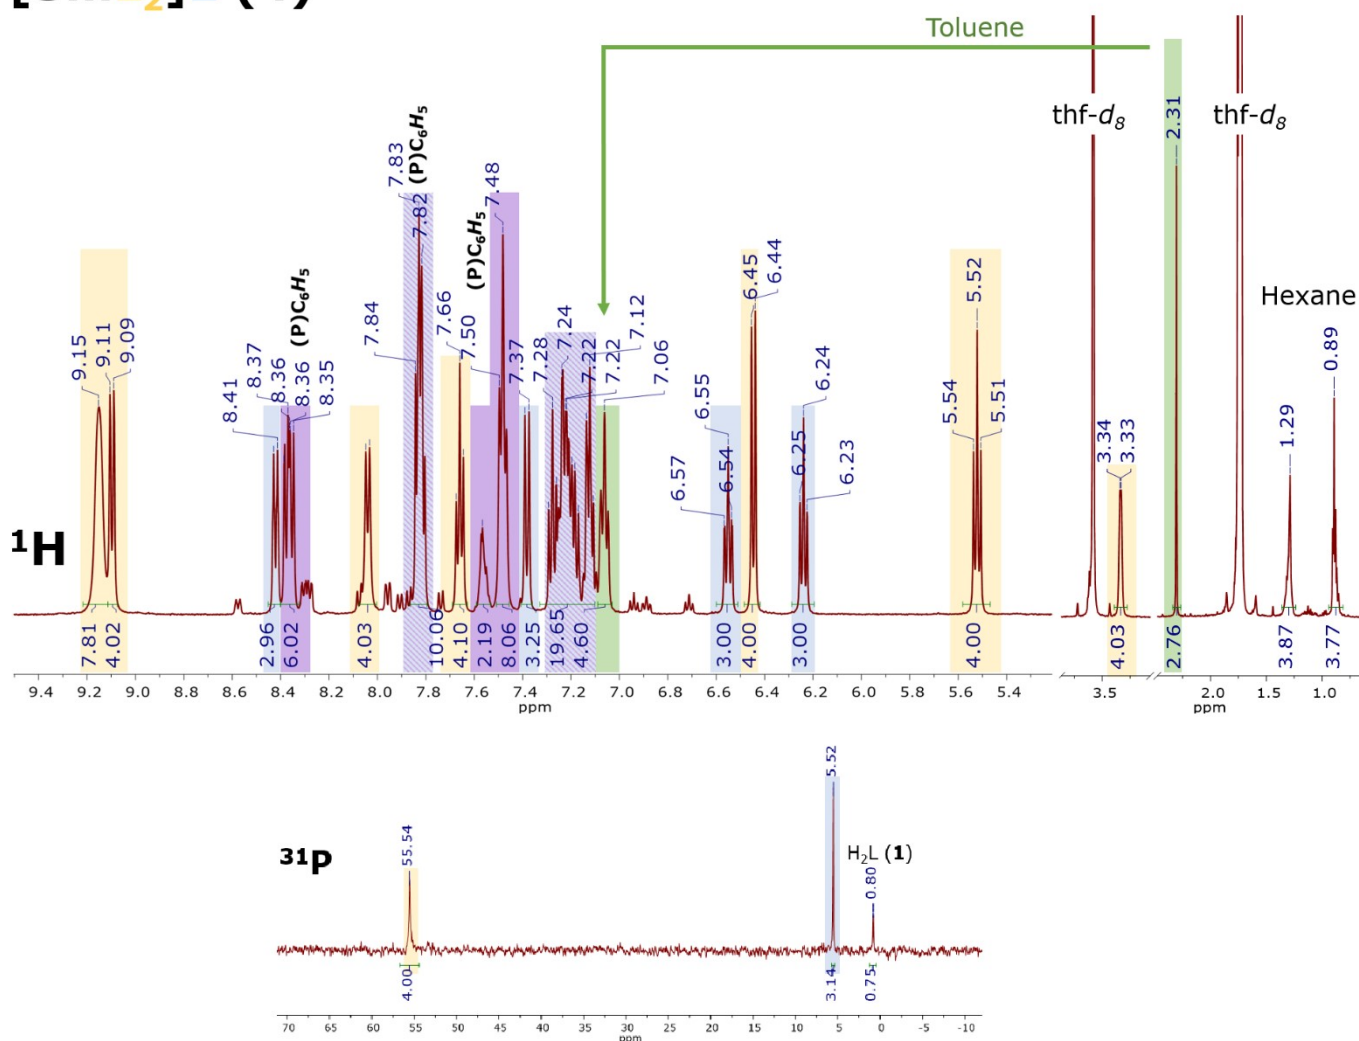

**Figure S6.** An approximate assignment of signals in the <sup>1</sup>H NMR and <sup>31</sup>P spectra of **4** in thf-*d*<sub>8</sub>. Another ratio coordinated : outer-sphere ligand may be caused by solvation or ligand redistribution effects.

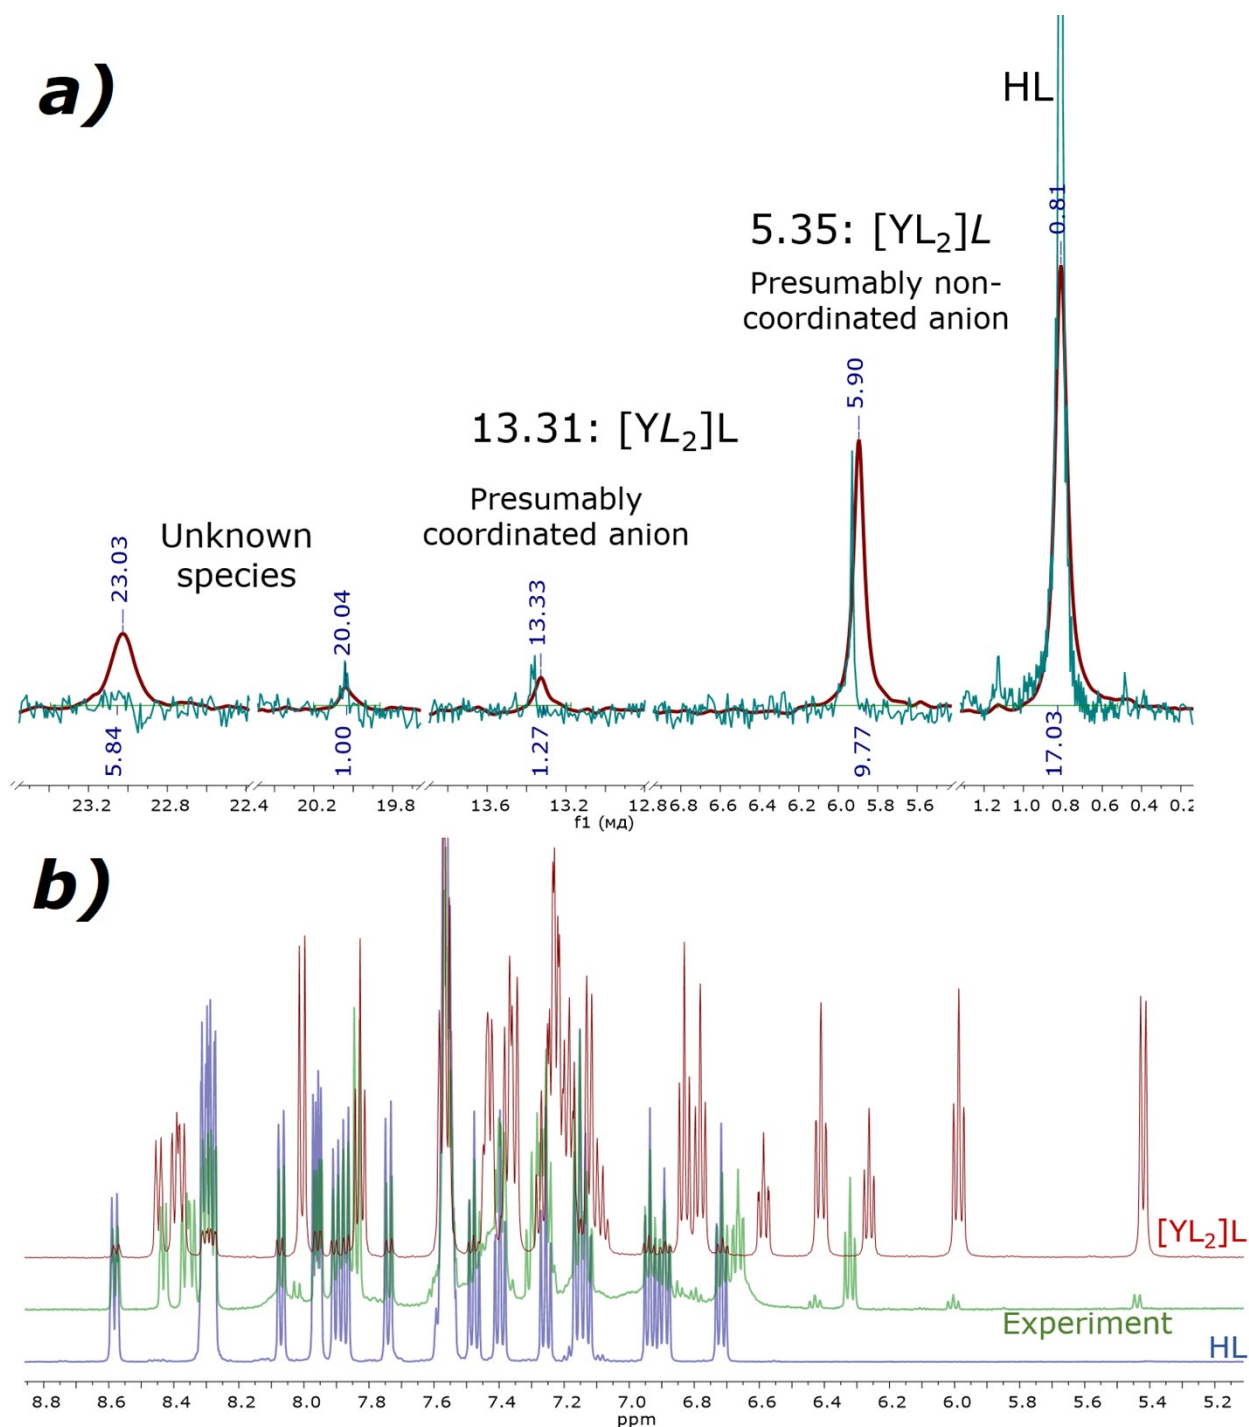

**Figure S7.** An approximate assignment of signals in the NMR experiment a)  $^{31}\text{P}$  (green: two days, 55°C; vinous: three days more, 70°C) and b)  $^1\text{H}$  NMR spectrum in  $\text{thf-d}_8$ .

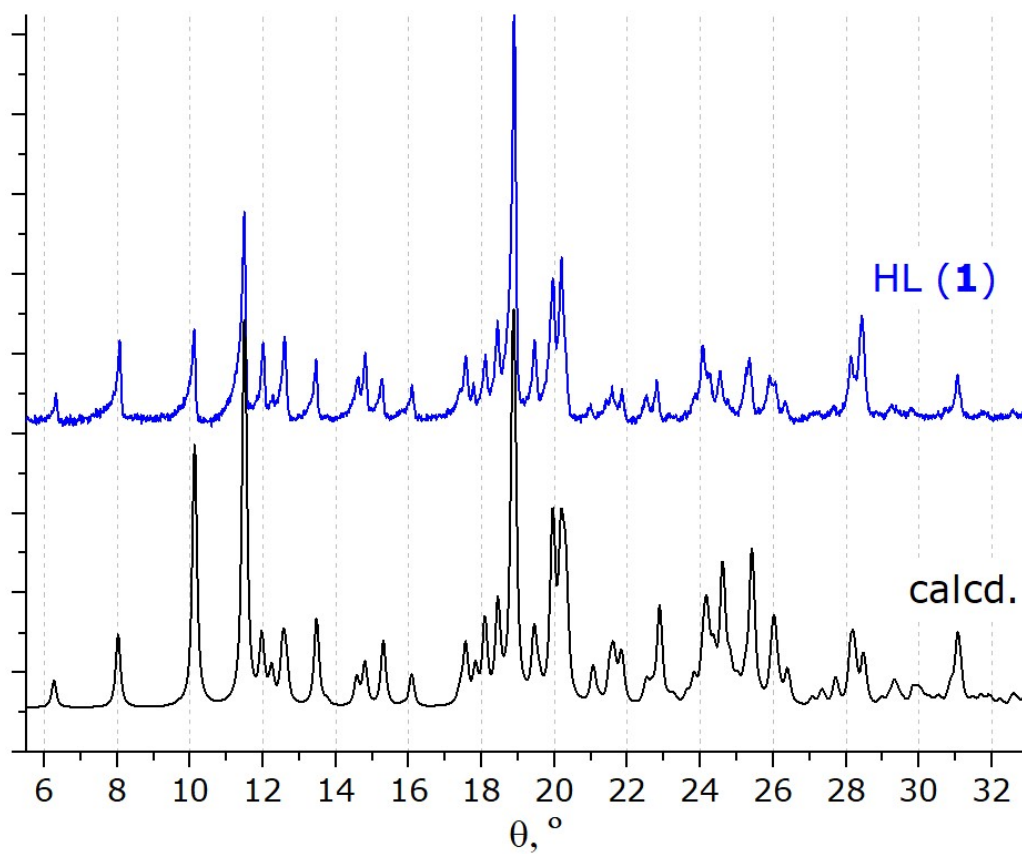

**Figure S8.** Powder pattern of **1**.



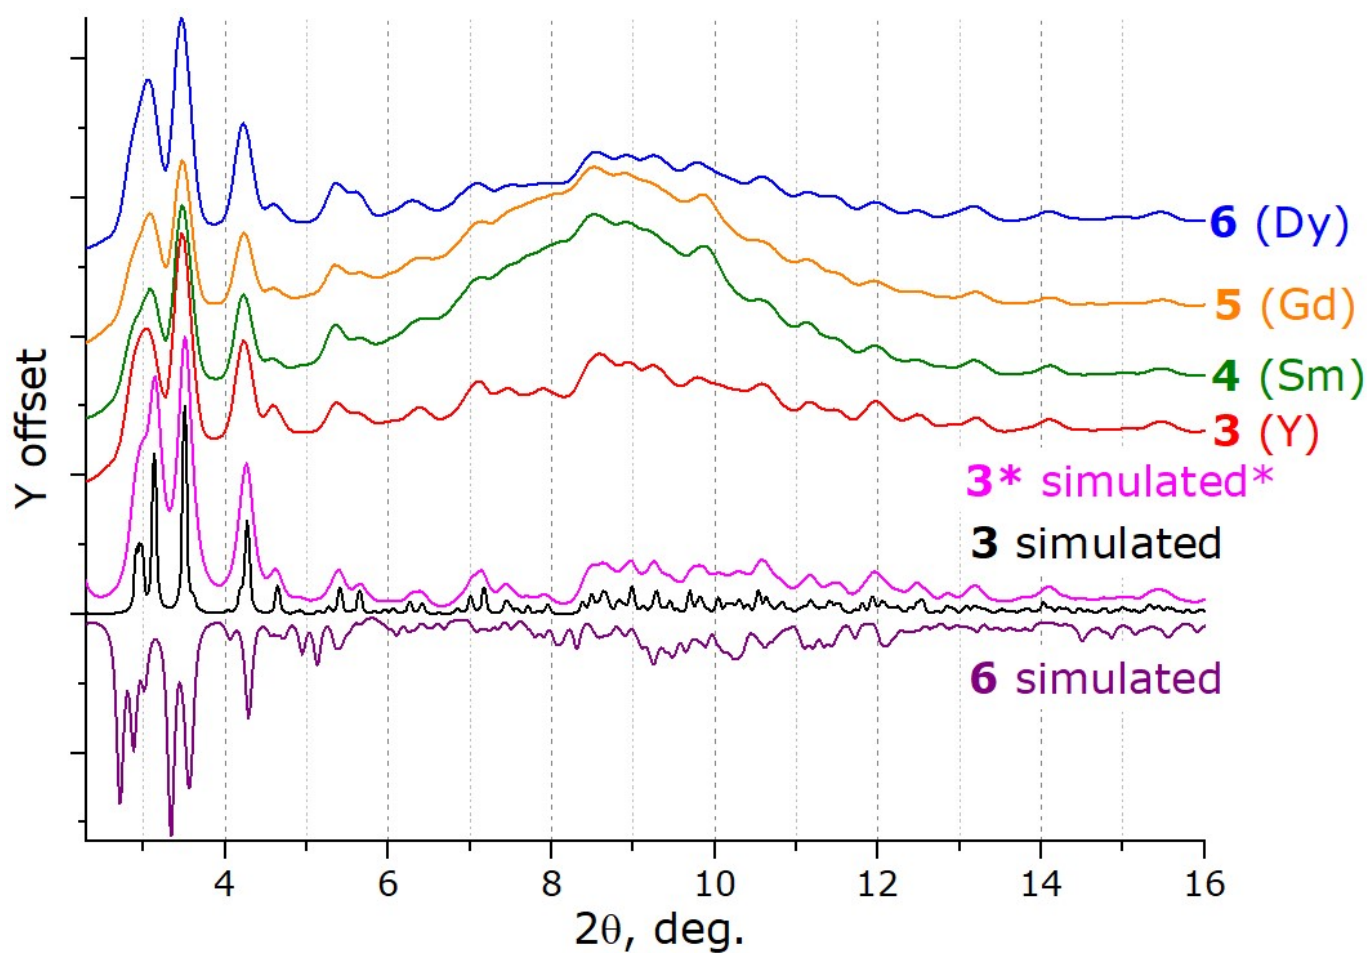

**Figure S9.** Powder patterns of compounds **3-6** (MoK $\alpha$  radiation,  $\lambda = 0.70932 \text{ \AA}$ ) measured for crystalline powders placed into perfluorinated oil. The halo at angles of  $8\text{--}10^\circ$  is due to the contribution of oil. Peaks below  $2.4^\circ$  are hidden by the beamstop, no prominent peaks are observed above  $16^\circ$  in the simulated and obtained powder patterns. Theoretical powder patterns for **3** and **4**, **5** and **6** are pairwise similar. The theoretical powder pattern for **3\*** is given with FWHM = 0.2 for illustrative purposes, for **3** and **6** FWHM = 0.1.

## Photophysical measurements

**Table S2.** Absorption maxima and molar extinction coefficients of **1**, **2**, **5**, and **6** in thf solution.

| Compound | $\lambda$ , nm       | $\epsilon$ , $10^{-4} \text{ M}^{-1}\text{cm}^{-1}$ | Compound | $\lambda$ , nm   | $\epsilon$ , $10^{-4} \text{ M}^{-1}\text{cm}^{-1}$ |
|----------|----------------------|-----------------------------------------------------|----------|------------------|-----------------------------------------------------|
| <b>1</b> | 230                  | 7.37                                                | <b>2</b> | 232              | 6.24                                                |
|          | 258                  | 3.21                                                |          | 260              | 3.33                                                |
|          | 283( <i>sh</i> )     | 2.77                                                |          | 284( <i>sh</i> ) | 3.10                                                |
|          | 296                  | 3.04                                                |          | 297              | 3.11                                                |
|          | 309( <i>sh</i> )     | 2.41                                                |          | 369( <i>br</i> ) | 1.51                                                |
|          | 361( <i>br</i> )     | 2.85                                                |          | 422( <i>br</i> ) | 2.08                                                |
| <b>4</b> | 230                  | 20.17                                               | <b>5</b> | 232              | 15.40                                               |
|          | 262                  | 10.78                                               |          | 261              | 8.25                                                |
|          | 299                  | 9.25                                                |          | 299              | 7.33                                                |
|          | 312( <i>sh</i> )     | 8.06                                                |          | 314( <i>sh</i> ) | 5.85                                                |
|          | 375( <i>sh</i> )     | 4.68                                                |          | 381( <i>sh</i> ) | 3.57                                                |
|          | 403( <i>br</i> )     | 4.92                                                |          | 406( <i>br</i> ) | 4.06                                                |
| <b>6</b> | 230                  | 16.64                                               |          | 423( <i>sh</i> ) | 3.82                                                |
|          | 261                  | 8.31                                                |          |                  |                                                     |
|          | 298                  | 7.41                                                |          |                  |                                                     |
|          | 312( <i>sh</i> )     | 6.21                                                |          |                  |                                                     |
|          | 368( <i>br</i> )     | 4.13                                                |          |                  |                                                     |
|          | 405                  | 3.01                                                |          |                  |                                                     |
|          | 424( <i>br, sh</i> ) | 2.64                                                |          |                  |                                                     |

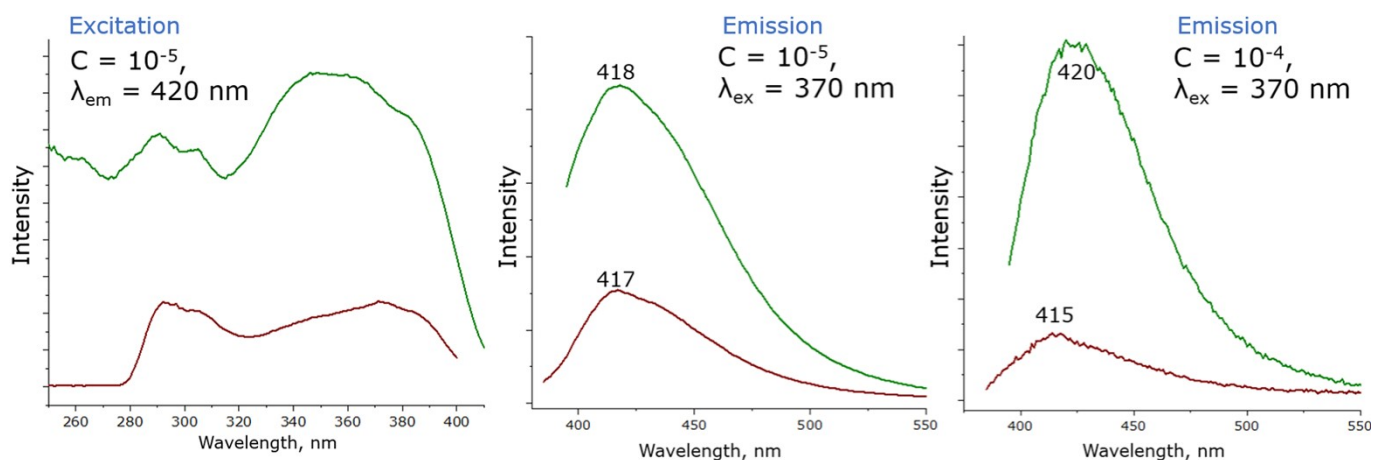**Figure S10.** Luminescence and excitation spectra of **1** in thf (green) and toluene (vine red) solutions of different concentrations.

**Table S3.** Coordinates\* of HL luminescence colour at the chromaticity diagram upon the corresponding excitation. \*The calculation accuracy may be decreased for the 410–430 nm range of excitation because of the overlay of excitation and emission regions.

| $\lambda_{\text{ex}}$<br>nm | 350     | 360     | 370     | 380     | 390     | 400     | 410     | 420     | 430     |
|-----------------------------|---------|---------|---------|---------|---------|---------|---------|---------|---------|
| x                           | 0.34517 | 0.32682 | 0.31654 | 0.30838 | 0.28227 | 0.27166 | 0.27267 | 0.23561 | 0.19947 |
| y                           | 0.23201 | 0.21736 | 0.2051  | 0.19173 | 0.16487 | 0.1553  | 0.16615 | 0.17701 | 0.21675 |

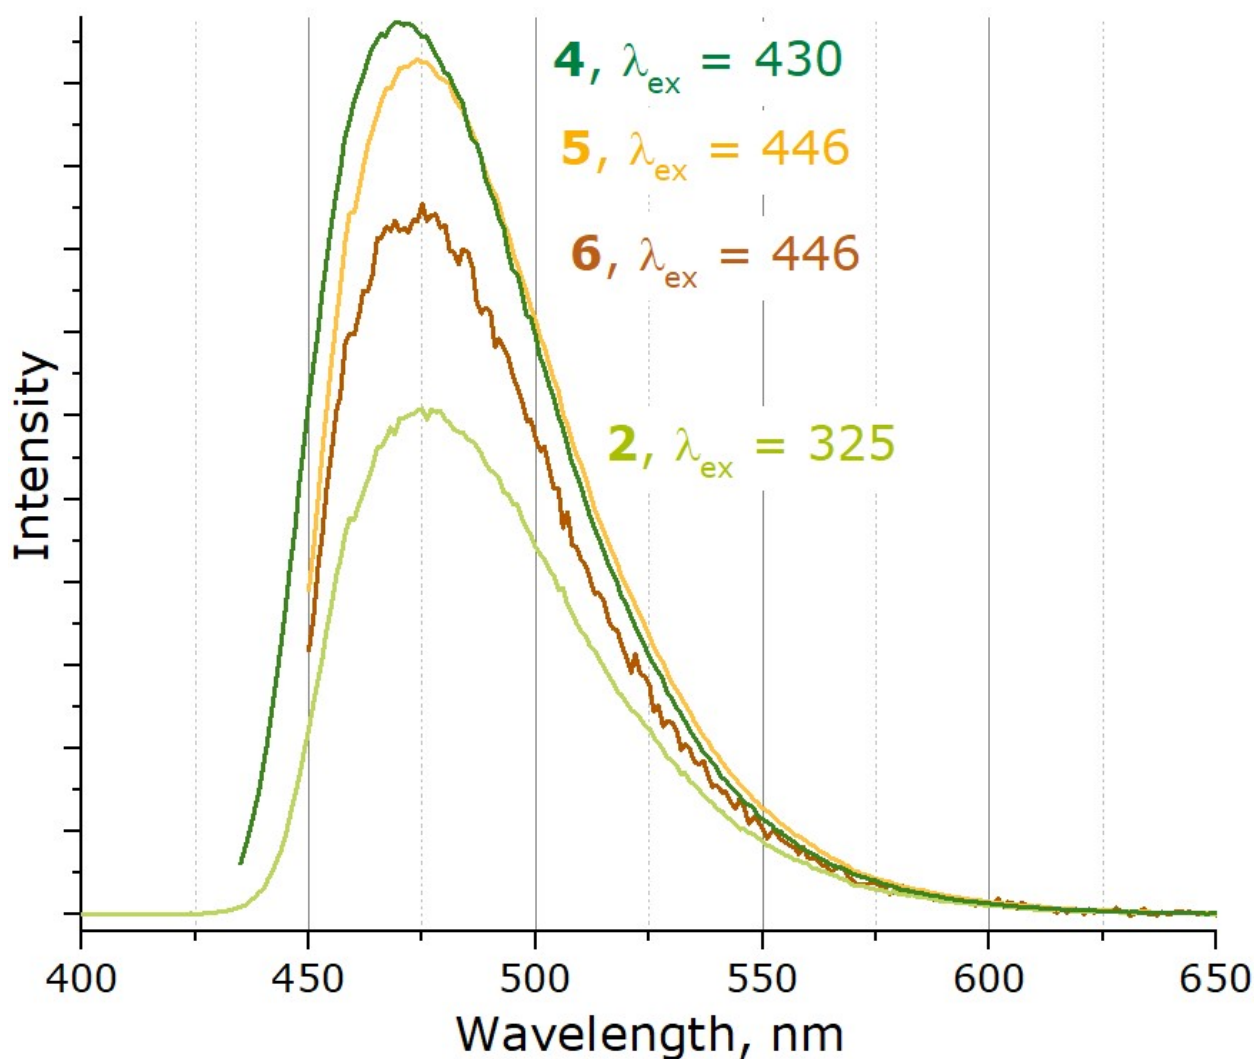

**Figure S11.** Luminescence spectra of thf solutions of compounds **2**, **4**, **5**, **6**, measured on Cary Eclipse. Slit widths  $2.5 \times 2.5$ ,  $C(\mathbf{2}, \mathbf{6}) = 1.2 \cdot 10^{-4}$  M,  $C(\mathbf{4}) = 1.3 \cdot 10^{-4}$  M,  $C(\mathbf{5}) = 9.9 \cdot 10^{-5}$  M.

## CIE 1931

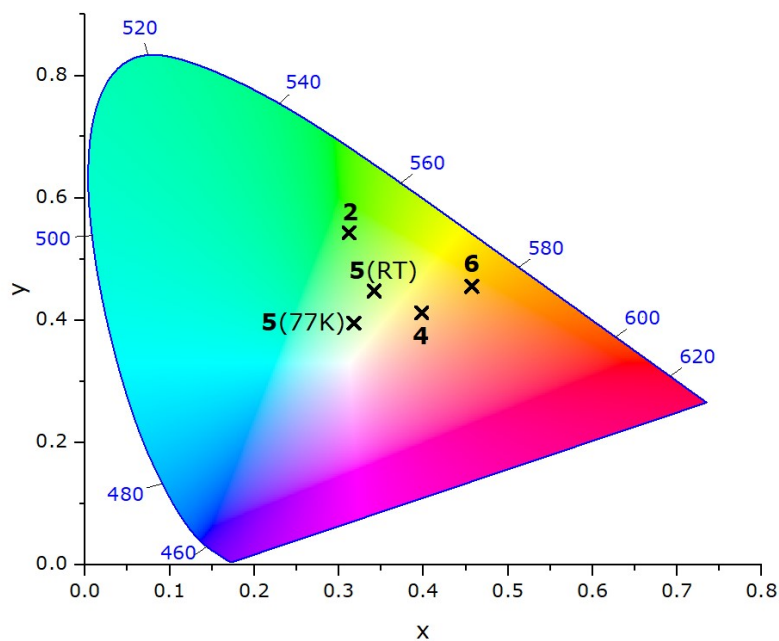

**Figure S12.** Positions of **2, 4-6** luminescence colour coordinates on CIE 1931 diagram.

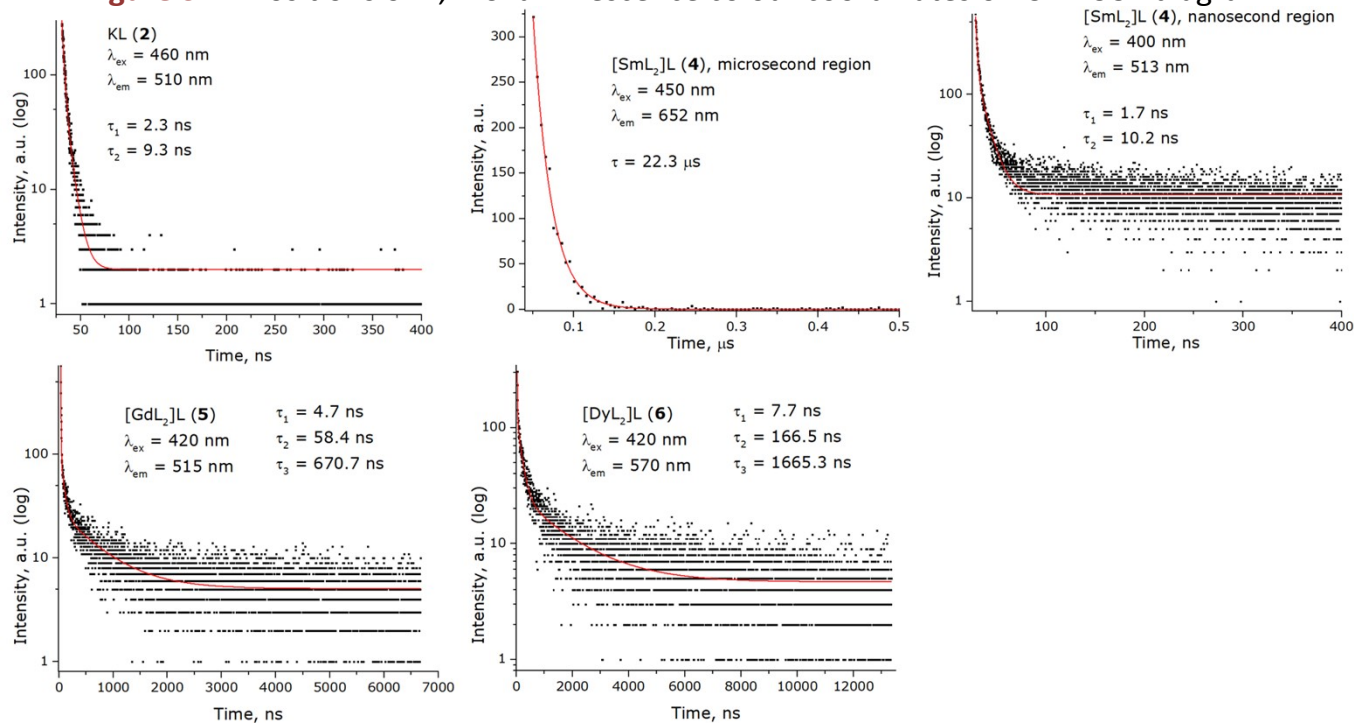

**Figure S13.** Decay curves of **2, 4-6** luminescence.

## Additional information

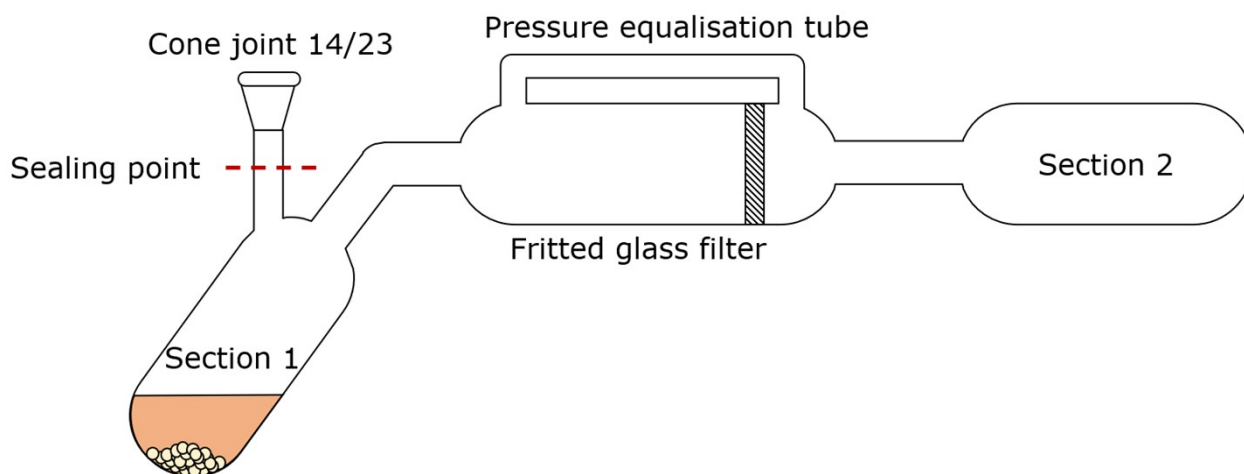**Figure S14.** Extraction apparatus.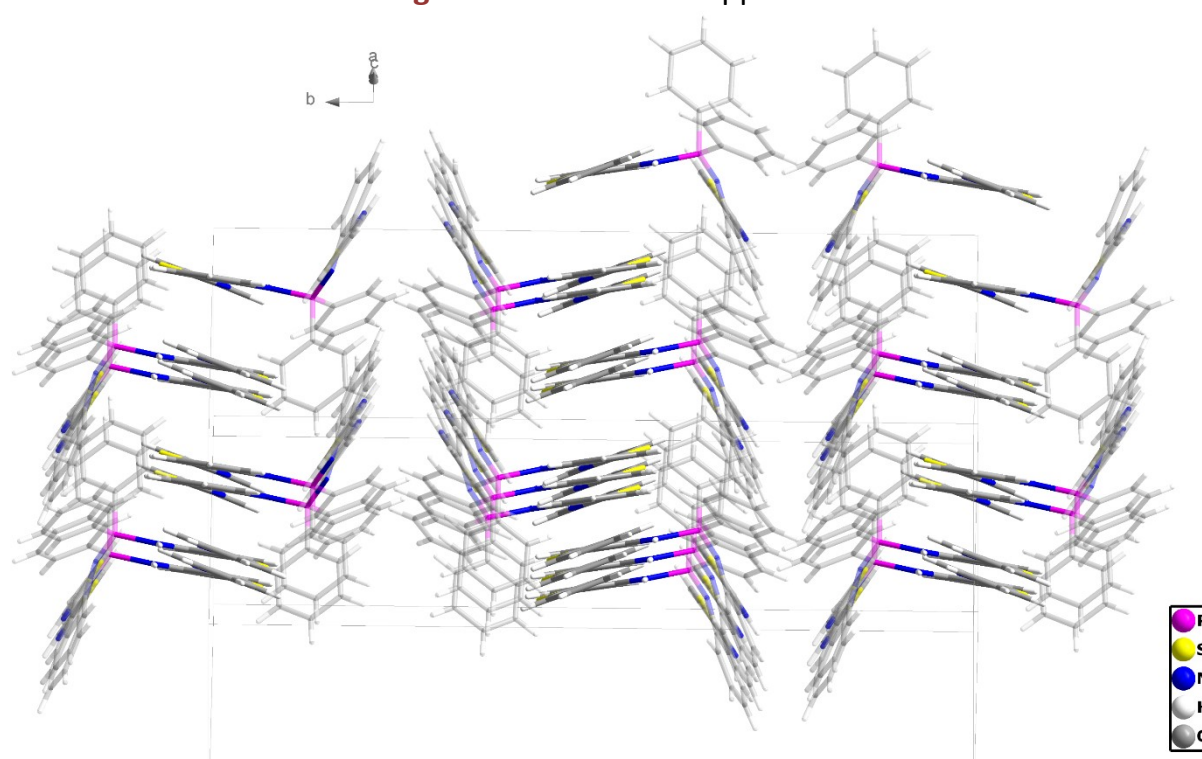**Figure S15.** Packing of **1**, conditioned by  $\pi$ -stacking.



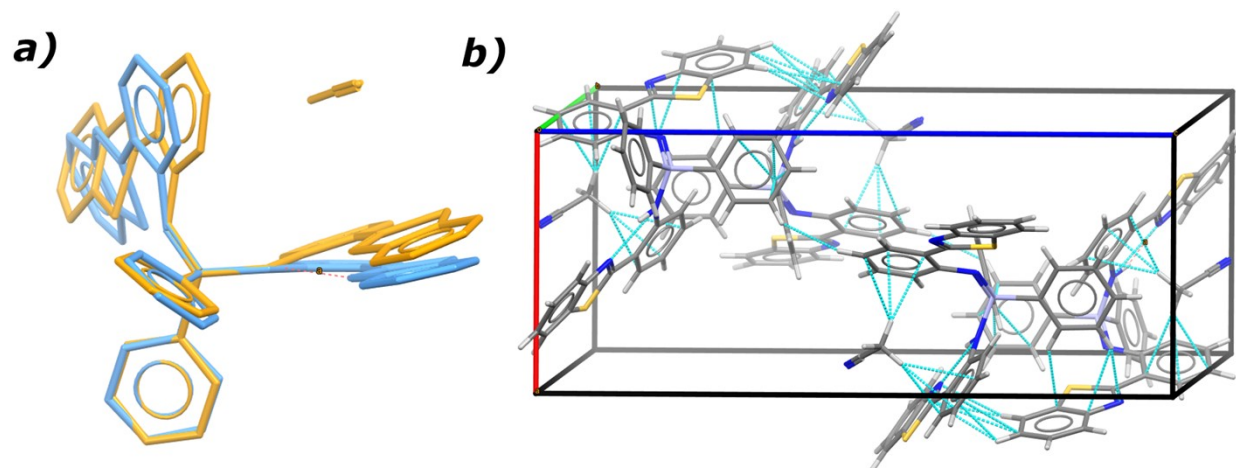

**Figure S16.** a) Overlay of molecules of HL in the structures of the solvent-free **1** and **1**·CH<sub>3</sub>CN; b) Packing of **1**·CH<sub>3</sub>CN.

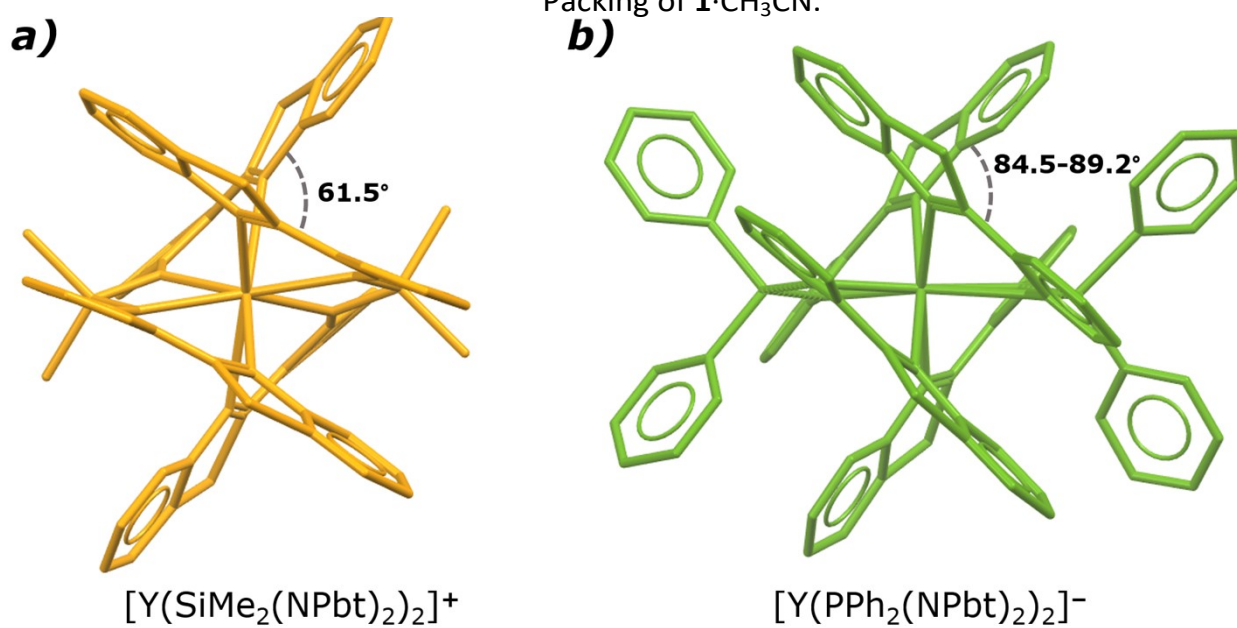

**Figure S17.** Comparison of [YL<sub>2</sub>] units.



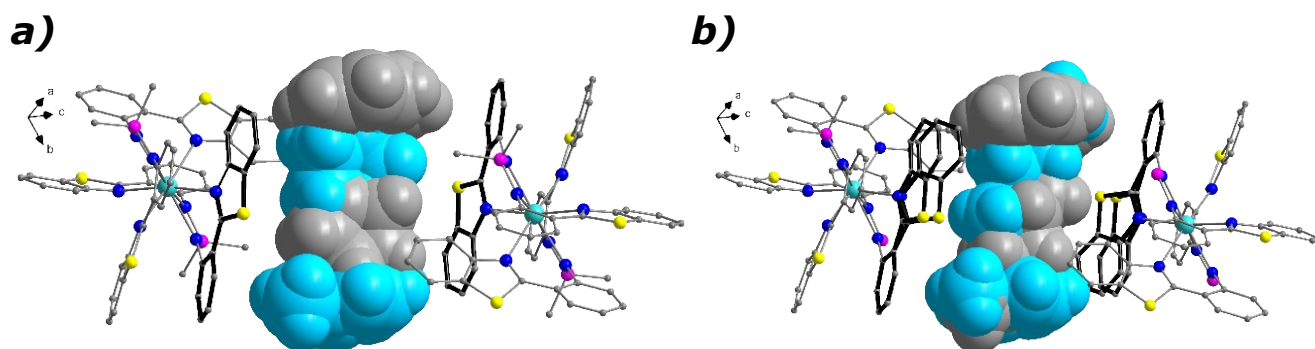

**Figure S18.** Comparison of a fragment of the structures of *a)* **3**·0.5thf·1.5tol and *b)* **3\***·0.4hexane·1.2tol revealing a slight variation in the positions of disordered solvent molecules. The different positions are shown as grey and blue spheres; the closest to them Pbt moieties are bolded. H atoms are omitted except for those in the solvent molecules.

According to single-crystal XRD analysis, the compounds reveal the presence of a cavity that can accommodate up to one toluene and one thf or hexane molecule disordered over proximate positions. This brings a slight variation in the crystal composition. By the example of the Y compound, we traced that the dried sample (**Figure S18b**) comprises approximately the same number of solvent molecules as in the as-synthesized crystal (**Figure S18a**). Notably, the closest to the cavity Pbt moieties can also show some disorder caused by a variation in nature and/or the number of solvent molecules.

According to  $^1\text{H}$  NMR spectroscopy, the sample of **3** contains hexane but not thf molecules. Thus, we speculate that the thf is replaced with hexane upon isolation of the products.
